# Intracellular copper storage and delivery in a bacterium

Jaeick Lee and Christopher Dennison\*

Biosciences Institute, Newcastle University, Newcastle upon Tyne, NE2 4HH, UK. E-mail:  
christopher.dennison@ncl.ac.uk

## Abstract

A family of cytosolic copper (Cu) storage proteins (the Csp3s) are widespread in bacteria. The Csp3s can bind large quantities of Cu(I) via their Cys-lined four-helix bundles, and the majority are cytosolic (Csp3s). This is inconsistent with the current dogma that bacteria, unlike eukaryotes, have evolved not to maintain intracellular pools of Cu due to its potential toxicity. Sporulation in *Bacillus subtilis* has been used to investigate if a Csp3 can store Cu(I) in the cytosol for a target enzyme. The activity of the Cu-requiring endospore multi-Cu oxidase *BsCotA* (a laccase) increases under Cu-replete conditions in wild type *B. subtilis*, but not in the strain lacking *BsCsp3*. Cuprous ions readily transfer from *BsCsp3*, but not from the cytosolic copper metallochaperone *BsCopZ*, to *BsCotA in vitro* producing active enzyme. Both *BsCsp3* and *BsCotA* are upregulated during late sporulation. The hypothesis we propose is that *BsCsp3* acquires and stores Cu(I) in the cytosol for *BsCotA*.

## 21 Introduction

22 Copper (Cu) is essential for most organisms, but use of this metal ion is associated with  
23 significant risks due to its potential toxicity. The availability of Cu is restricted by the presence of  
24 high-affinity sites in both eukaryotes (1) and prokaryotes (2). Import, cytosolic handling,  
25 trafficking to different locations, and storage have all been characterised in eukaryotic cells (3).  
26 In bacteria, some of these processes are either not thought to occur, or are not yet fully  
27 understood. For example, the plasma membrane protein CcoG, which reduces Cu(II) to the  
28 preferred intracellular oxidation state (Cu(I)) has only recently been identified in bacteria as a  
29 cytochrome oxidase (COX) assembly factor (4). The reduction of Cu(II) prior to import into  
30 eukaryotic cells has been known to occur for many years (3, 5). Excess Cu(I) is removed from  
31 the cytosol by probably the best-studied component of bacterial Cu homeostasis; a Cu-  
32 transporting P-type ATPase (CopA), which can be assisted by the cytosolic Cu  
33 metallochaperone CopZ (Figure 1a) (3, 6-9). Toxicity has been shown to involve Cu(I) binding in  
34 place of the native metal in cytosolic iron-sulfur (Fe-S) cluster-containing proteins (10), and Cu  
35 catalyses ROS formation (3, 7, 8). The intracellular damage that Cu can cause, and the current  
36 dearth of intracellular Cu-requiring enzymes (11), has resulted in a prevailing view that bacteria  
37 have evolved not to use Cu in the cytosol (8, 11). However, there is no *a priori* reason why  
38 bacteria, like eukaryotes, cannot utilise Cu in this compartment if mechanisms are available to  
39 enable its safe handling, i.e. by ensuring tight chelation and specific delivery. The presence of  
40 cytosolic Cu storage proteins (Csps) that can bind large quantities of Cu(I) with high affinity (12-  
41 15), provides a possible route for intracellular Cu use in bacteria.

42  
43 The Csps were first identified in Gram-negative bacteria that oxidize methane (12). These  
44 methanotrophs can possess different Csp homologues, all having many Cys residues lining the  
45 cores of their four-helix bundles, enabling the binding of large quantities of Cu(I) ions (12-14). A  
46 Csp exported from the cytosol (Csp1) can store up to 52 Cu(I) ions per tetramer for the  
47 particulate (membrane-bound) methane monooxygenase (pMMO) in the model methanotroph  
48 *Methylosinus trichosporium* OB3b (*MtCsp1*) (12). *MtCsp1* is upregulated (16) at the Cu  
49 concentrations required for methane oxidation by pMMO in switchover methanotrophs, which  
50 can use a soluble Fe MMO when Cu is limiting (17). However, a cytosolic Csp homologue  
51 (*MtCsp3*) is not upregulated with pMMO in *M. trichosporium* OB3b (16).

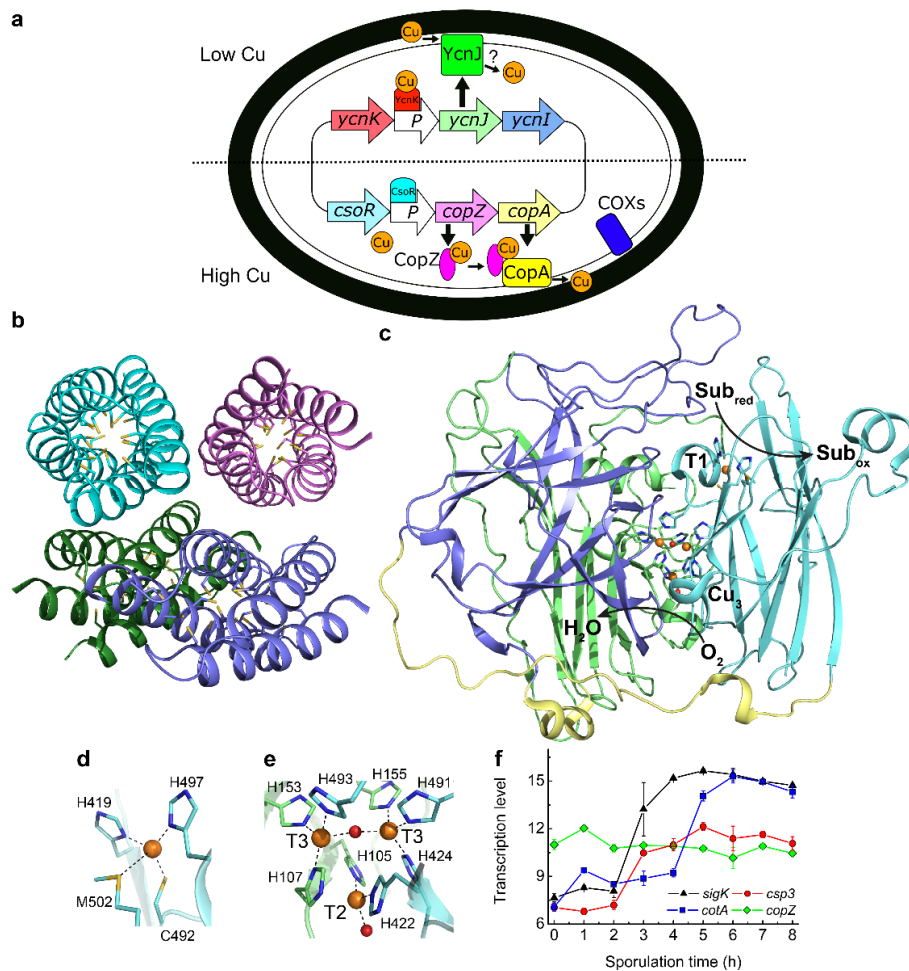

52

53 **Figure 1.** Copper handling, a cytosolic Cu(I) storage protein, a Cu-requiring enzyme, and their  
54 transcription during sporulation in *B. subtilis*. (a) An overview of Cu homeostasis in *B. subtilis*  
55 (orange circles, oxidation state undefined) export by CopA and CopZ (regulated by CsoR) (19), and import  
56 by YcnJ (regulated by YcnK) (20, 22). YcnI is also membrane bound and binds Cu(II) *in vitro*, but its role in  
57 Cu homeostasis is unclear (23). The only currently known Cu-requiring enzymes in vegetative *B. subtilis*  
58 cells are two cytochrome oxidases (COXs) located on the plasma membrane (11, 24). (b) The crystal  
59 structure of Cu(I)-free *BsCsp3* (PDB: 5FIG), a tetramer of four-helix bundles each with 19 Cys residues  
60 pointing into their cores enabling the binding of up to ~20 Cu(I) ions per monomer (13). (c) The crystal  
61 structure of the endospore multi-Cu oxidase (a laccase) *BsCotA* (PDB: 1W6L, (27)) with domains 1, 2 and  
62 3 coloured green, slate and cyan, respectively (the linking regions are yellow). Substrates are oxidized  
63 (Sub<sub>red</sub> to Sub<sub>ox</sub>) at the T1 Cu centre with electrons passed to the T2/T3 trinuclear (Cu<sub>3</sub>) cluster where  
64 oxygen is reduced to water. Detailed views of the T1 Cu site (d) and the Cu<sub>3</sub> cluster (e), with the side  
65 chains of coordinating residues represented as sticks, Cu ions as orange spheres and the oxygen atoms  
66 of water (bound to the T2 Cu) and hydroxide (bridging the T3 Cu ions) ligands as red spheres in (c-e). (f)  
67 Transcription profiles (29) of the *sigK* ( $\sigma^K$ , which facilitates spore coat protein expression, black triangles),  
68 *csp3* (red circles), *cotA* (blue squares) and *copZ* (green diamonds) genes during sporulation.

69

70 The Gram-positive bacterium *Bacillus subtilis* is an excellent model system for investigating  
71 the role of a Csp3, as its Cu homeostasis system is well characterised (Figure 1a) (7, 18-23).  
72 The *copZA* operon (Cu efflux machinery, *vide supra*) and its Cu-sensing repressor CsoR (7, 18,

73 19, 21) are probably the best-studied components. The membrane protein YcnJ is upregulated  
74 under Cu-limiting conditions, controlled by the suggested repressor YcnK (20, 22), and has been  
75 proposed to play a role in Cu acquisition (Figure 1a). The membrane-anchored YcnI is part of  
76 the same (*ycnKJI*) operon and is also regulated by YcnK (22). The soluble domain of YcnI binds  
77 Cu(II) *in vitro*, and this protein has been suggested to function as a Cu metallochaperone (23).  
78 Cytosolic Cu(I) could be safely stored in *B. subtilis* by the Csp3 homologue (*BsCsp3*) whose  
79 core is lined with 19 Cys residues (Figure 1b), which enable the binding of ~80 Cu(I) ions per  
80 tetramer *in vitro* (13). Overexpressing *BsCsp3* in the cytosol of a Gram-negative heterologous  
81 host (*Escherichia coli*) allows growth at otherwise harmful Cu concentrations, and the protein  
82 can acquire Cu(I) in the presence of both CopA and CopZ (15).

83

84 Only two families of Cu enzymes are currently known to be present in *B. subtilis*; COXs  
85 located on the plasma membrane and the multi-Cu oxidase (MCO; a laccase) *BsCotA* (11, 24-  
86 27). The latter is an outer spore-coat (endospore) enzyme (28) that possesses the typical type 1  
87 (T1), 2 (T2) and 3 (T3) Cu sites of an MCO (27), which are involved in the catalytic cycle (see  
88 Figure 1c-e). It produces a melanin-like pigment thought to provide spores with protection  
89 against hydrogen peroxide and UV light (25, 28). *BsCotA* is upregulated during the latter stages  
90 of sporulation, as is *BsCsp3* (Figure 1f) (29).

91

92 *BsCsp3* does not provide resistance to Cu toxicity. We have therefore tested the hypothesis  
93 that *BsCsp3* safely stores Cu(I) ions in the cytosol for a Cu-requiring enzyme by investigating the  
94 effect of gene deletion on the activity of *BsCotA* in spores grown under Cu limiting and replete  
95 conditions. The data obtained indicate a direct role for *BsCsp3* in ensuring the maximum activity  
96 of *BsCotA*. The ability of *BsCsp3* to activate *BsCotA* has been confirmed by the *in vitro* transfer  
97 of Cu(I) between these proteins. A model for how *BsCotA* acquires Cu(I) from *BsCsp3* during  
98 sporulation is proposed. This is the first example showing that an enzyme can acquire Cu in the  
99 cytosol of a bacterium as well as identifying the partner protein.

100

## 101 Results

### 102 Is *BsCsp3* involved in combating Cu toxicity in *B. subtilis*?

103 The presence of a protein with a high capacity for Cu(I) in the cytosol of *B. subtilis* (12-14) would  
104 suggest a role in helping to prevent the problems caused by excess Cu (10, 15). The toxicity of  
105 Cu to bacteria is highlighted by the influence increasing Cu concentrations in media has on the  
106 growth of wild type (WT) *B. subtilis* (Supplementary Figure 1). At higher Cu levels cells grow  
107 extremely slowly, with a very small increase in the absorbance/OD observed only after more  
108 than 6 h at 2 mM Cu, and this coincides with elevated intracellular Cu concentrations  
109 (Supplementary Figure 2). Very similar growth and Cu accumulation results are obtained for the

110 strain ( $\Delta csp3$ ) lacking the *csp3* gene (Supplementary Figures 1 and 2). These data exhibit an  
111 overall likeness to work we reported previously (13), particularly at up to 12 h growth. However,  
112 the response to specific Cu concentrations varies, indicating the amounts of Cu added to media  
113 must differ. In the present work we are sure of the Cu concentrations in media, having carefully  
114 quantified all Cu(II) stocks before their addition, and the reported values in the previous study  
115 (13) appear to be too high. The growth studies reported herein demonstrate that *BsCsp3* is not  
116 involved in helping prevent the harmful effects on *B. subtilis* caused by elevated Cu levels.  
117 Therefore, the protein does not have a function like eukaryotic Cys-rich metallothioneins (3).

118

### 119 **Using sporulation to determine the function of *BsCsp3***

120 The *csp3* and *cotA* genes are both upregulated (29) at similar stages during sporulation (Figure  
121 1f), and *BsCotA* is the only known Cu-requiring enzyme present in spores. We have therefore  
122 studied whether *BsCsp3* stores Cu(I) for *BsCotA*. This enzyme binds four Cu ions (Figure 1c-e)  
123 and oxidises the laccase substrate 2,2'-azino-bis(3-ethylbenzothiazoline-6-sulfonic acid) (ABTS)  
124 *in vitro* and in spores (26). For WT *B. subtilis* spores the ability to oxidise ABTS increases  
125 approximately two-fold when 50  $\mu$ M Cu is added to media during sporulation (Figure 2a and  
126 Supplementary Figure 3a,b). Incubation with Cu(II) only enhances the activity of purified WT  
127 spores obtained in the absence of added Cu (Supplementary Figure 4 and Table 1), consistent  
128 with previously reported data (26). This indicates that unless supplemented, sporulation media  
129 does not contain sufficient Cu ( $\sim$ 0.4  $\mu$ M) to fully metallate all of the *BsCotA* produced. However,  
130 the addition of 50  $\mu$ M Cu, a non-toxic concentration, during growth enables *B. subtilis* to obtain  
131 enough of the metal to generate only fully Cu-loaded *BsCotA* in the endospore.

132

133 The *BsCotA* activity of  $\Delta csp3$  *B. subtilis* spores grown without added Cu is similar to that for  
134 WT spores produced under the same conditions (Figure 2b and Supplementary Figure 3c,d).  
135 However, unlike for WT *B. subtilis*, supplementing media with Cu during sporulation has no  
136 effect on *BsCotA* activity for the  $\Delta csp3$  strain. Similar to the WT data, incubation with Cu only  
137 significantly increases the activity of purified  $\Delta csp3$  spores grown in the absence of added Cu  
138 (Supplementary Figure 4 and Table 1). These results demonstrate that *BsCsp3* plays a role in  
139 storing Cu for *BsCotA*, particularly under Cu-replete conditions. Some *BsCotA* activity remains  
140 for  $\Delta csp3$  *B. subtilis* spores, and an alternative mechanism of Cu transfer to *BsCotA* must exist,  
141 which could also be responsible for the activity observed in the WT strain under Cu-limiting  
142 conditions.

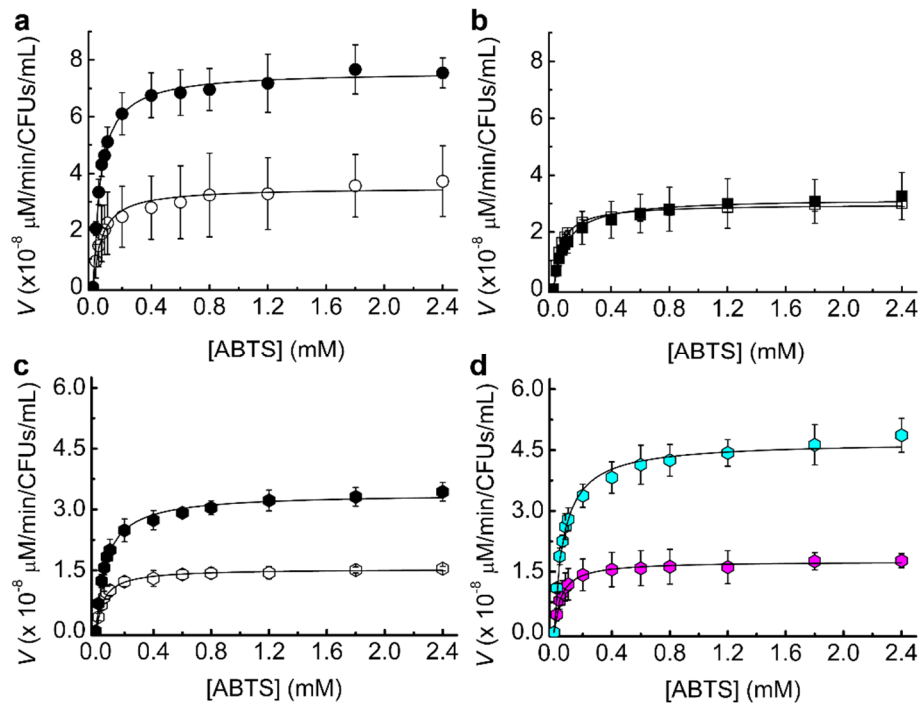

143

144 **Figure 2.** The influence of Cu levels and deleting the *csp3* gene on *BsCotA* activity in *B. subtilis*.

145 Michaelis-Menten plots of *BsCotA* activity for heated purified spores from WT (a),  $\Delta\text{csp3}$  (b), and the  
146 complemented  $\Delta\text{csp3}$  (c, d) strains. Spores (a, b and c) were produced in Difco sporulation media plus no  
147 (open symbols) and 50  $\mu\text{M}$  (black filled symbols) added  $\text{Cu}(\text{NO}_3)_2$ . (d) For the complemented  $\Delta\text{csp3}$  strain  
148 sporulation was also carried out in the presence of 1 mM IPTG with either no (magenta) or 50  $\mu\text{M}$  (cyan)  
149 added  $\text{Cu}(\text{NO}_3)_2$ . The plots from which the initial rates for WT and  $\Delta\text{csp3}$  *B. subtilis* spores were obtained  
150 are shown in Supplementary Figure 3. Averages and standard deviations from kinetic measurements in  
151 100 mM citrate-phosphate buffer pH 4.0 using three different sets of spores are shown.

152

153 To confirm that *BsCsp3* supplies Cu(I) to *BsCotA* *in vivo*, the  $\Delta\text{csp3}$  strain was complemented  
154 by introducing an inducible copy of the *csp3* gene at a different location (the *amyE* locus). The  
155 highest *BsCotA* activity is obtained for spores of this strain grown in the presence of isopropyl  $\beta$ -  
156 D-thiogalactopyranoside (IPTG, the inducer) and Cu (Figure 2c,d). Activity is almost three-fold  
157 greater than without their addition, similar to the increase caused by Cu in WT *B. subtilis* spores  
158 (Figure 2a). Elevated activity is observed for spores from the complemented strain grown with  
159 Cu, but not IPTG, present in the media (Figure 2c). To ensure this effect is due to leaky  
160 expression, a well-established feature of the promoter used [for example, see ref. 30], a control  
161  $\Delta\text{csp3}$  strain was constructed (see Material and Methods). In this case, the ability to oxidise  
162 ABTS is hardly influenced by the presence of Cu and IPTG (Supplementary Figure 5).  
163 Therefore, the increased *BsCotA* activity for the complemented  $\Delta\text{csp3}$  strain is due to the IPTG-  
164 inducible copy of the *csp3* gene.

## 165 **Cu(I) transfer from *BsCsp3* to *BsCotA* *in vitro***

166 The above data support the hypothesis that *BsCsp3* can store Cu(I) in the cytosol under Cu-  
167 replete conditions, which is used to metallate *BsCotA*. To further test this idea, the transfer of  
168 Cu(I) from *BsCsp3* to inactive apo(Cu-free)-*BsCotA* has been studied *in vitro*. We have  
169 previously found (12, 13) that Cu(I) removal from Csp3s by a large excess of high-affinity Cu(I)  
170 ligands is slow (~60% removal in 24 h for *BsCsp3* using bathocuproine disulfonate, see  
171 Supplementary Figure 6 and Table 2). The transfer of Cu(I) from *BsCsp3* to *BsCotA* occurs  
172 quickly when using a 10-fold excess of Cu(I) in the storage protein over sites in the enzyme,  
173 and >50% maximum activity is achieved within 6 h (Figure 3 a,b and Figure 4a). A control  
174 experiment was performed studying activation of as-isolated *BsCotA* with Cu(I) in the absence of  
175 *BsCsp3*, which is faster, but still takes 4 h to complete.

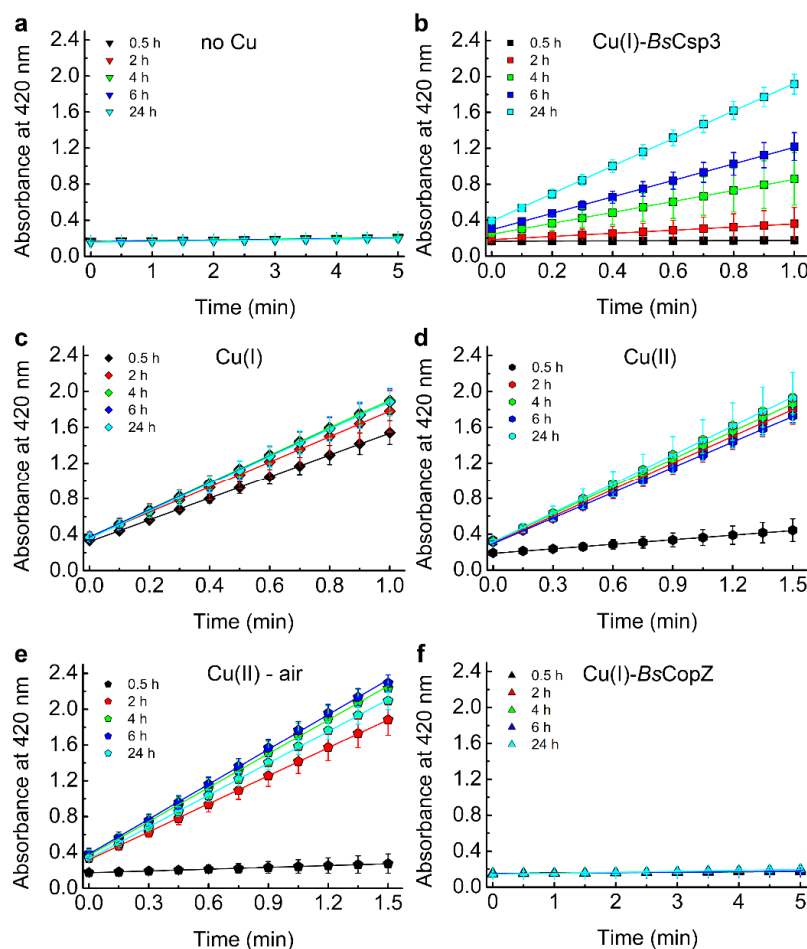

176  
177 **Figure 3.** Kinetic analysis of the activity of *BsCotA* after incubation with Cu from difference sources. Plots  
178 of absorbance at 420 nm against time for the reaction with 2.4 mM ABTS of mixtures of apo-*BsCotA*  
179 incubated with buffer (a), Cu(I)-*BsCsp3* (b), Cu(I) (c), Cu(II) (d and e) and Cu(I)-*BsCopZ* (f) for 0.5, 2, 4, 6  
180 and 24 h. Mixtures were incubated in 20 mM HEPES pH 7.5 plus 200 mM NaCl (the buffer used in a), and  
181 *BsCotA* activity was measured 100 mM citrate-phosphate buffer pH 4.0. All data (averages from three  
182 independent experiments with error bars showing standard deviations) are from mixtures incubated under  
183 anaerobic conditions, apart from in e when *BsCotA* and Cu(II) were incubated in air. The resulting activity  
184 data at these and other incubation times are shown in Figure 4.

185 A further control was carried out using Cu(II) and metalation of the enzyme is slower than for  
186 Cu(I) both under anaerobic and aerobic conditions (Figure 3c-e and Figure 4b). Another  
187 cytosolic Cu(I)-binding protein with a well-established role (18) in Cu homeostasis (delivering  
188 Cu(I) to *BsCopA*) and a similar Cu(I) affinity (31) to *BsCsp3* (13) is *BsCopZ* (see Figure 1a). As  
189 this was another potential source of Cu(I) for *BsCotA* we tested to see if *BsCopZ* could transfer  
190 Cu(I) to *BsCotA* (Figure 3f and Figure 4a). After the incubation of apo-*BsCotA* with Cu(I)-  
191 *BsCopZ* for 48 h very little activity is observed, and Cu(I) transfer does not occur.

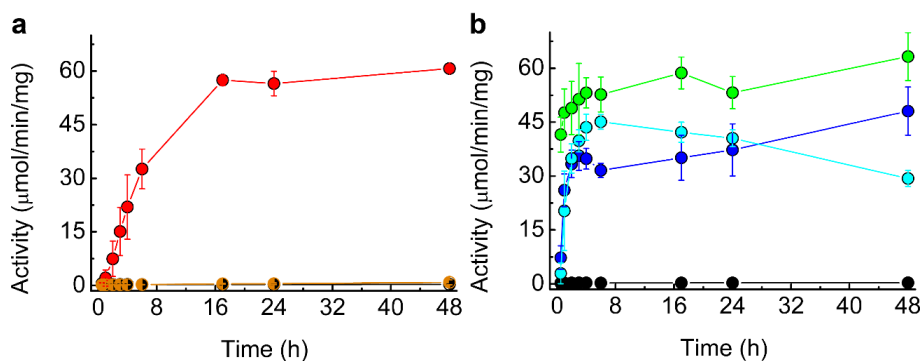

192 **Figure 4.** Cu(I) transfer from *BsCsp3* to *BsCotA*. (a) Plots of activity (average from three independent  
193 experiments with error bars showing standard deviations) against incubation time of as-isolated *BsCotA*  
194 incubated with Cu(I)-*BsCsp3* (red circles), Cu(I)-*BsCopZ* (half-orange circles) and buffer alone (half-black  
195 circles) for up to 48 h under anaerobic conditions. The activity data for as-isolated *BsCotA* plus buffer  
196 alone (black circles) are also shown in (b), as well as the results from control experiments in which the  
197 enzyme was incubated with Cu(I) (green circles) and Cu(II) under anaerobic conditions (blue circles), and  
198 also with Cu(II) in air (cyan circles). The kinetic data at selected time points are shown in Figure 3.

## 200 Discussion

201 Herein we demonstrate that *BsCsp3* stores Cu(I) in the cytosol during sporulation for the Cu-  
202 requiring enzyme *BsCotA*. This is not the only mechanism available to load *BsCotA* with Cu as  
203 some activity is still observed in  $\Delta csp3$  *B. subtilis*. A possibility we considered was that the  
204 cytosolic Cu metallochaperone *BsCopZ*, as well as transferring Cu(I) to *BsCopA*, may also store  
205 cuprous ions in the cytosol, which could be transferred to *BsCotA* (the Cu(I) affinity of *BsCopZ* is  
206 similar to that of *BsCsp3* (13, 31)). This is supported by the suggestion that *BsCopZ* could play a  
207 role in Cu(I) sequestration and recycling in *B. subtilis* (18) as less Cu accumulates in the  $\Delta copZ$   
208 strain compared to WT. Furthermore, the activity of *CotA* from a different *Bacillus* strain is  
209 enhanced when co-expressed in the cytosol of *E. coli* with its native *CopZ* (32). However, the *in*  
210 *vitro* studies reported here show that *BsCopZ* cannot transfer Cu(I) to *BsCotA* (Figure 3f and  
211 Figure 4a). The source(s) of Cu(I) for activating *BsCotA* in the absence of *BsCsp3*, and also at  
212 lower intracellular concentrations of the metal ion, remain(s) to be established. Regardless, the  
213 lack of Cu(I) transfer from *BsCopZ* highlights the specificity of the *BsCsp3*-*BsCotA* interaction.  
214 This is essential in a cell as it ensures protein-mediated Cu(I) transfer to the correct destination,  
215 as observed for other Cu-homeostasis proteins (1, 33-39).



217 Considering the high Cu(I) affinity (13) of *BsCsp3* ( $(1.5 \pm 0.4) \times 10^{17} \text{ M}^{-1}$ ), transfer of cuprous  
 218 ions to *BsCotA* has to occur via an associative mechanism (unassisted Cu(I) off-rates for  
 219 *BsCsp3* can be estimated (14) to be  $\sim 10^{-9} \text{ s}^{-1}$ ). For the acquisition of such tightly bound Cu(I) to  
 220 be possible, metalation must take place once the target enzyme has at least partially folded so  
 221 the sites where Cu binds have formed. The T1 Cu site is closest to the surface of *BsCotA* (the  
 222 His497 ligand is solvent exposed), and is  $\sim 12.5\text{-}15.5 \text{ \AA}$  from the  $\text{Cu}_3$  cluster (Figure 1c).  
 223 Therefore, *BsCsp3* association at more than one location may be required to metalate all of the  
 224 sites in folded *BsCotA*. Published Cu(I) affinities of T1 Cu sites (40, 41) are  $(2.1\text{-}4.0) \times 10^{17} \text{ M}^{-1}$ ,  
 225 similar to the average Cu(I) affinity of *BsCsp3* (13). Therefore, Cu(I) transfer from the storage  
 226 protein to the enzyme should not be hindered thermodynamically (37, 40). To facilitate access to  
 227 the more buried  $\text{Cu}_3$  cluster the protein may need to be partially unfolded. The MCO CueO from  
 228 *E. coli* undergoes a transition from an ‘open’ non-metallated folded form with accessible Cu  
 229 sites, to a more ‘closed’ conformation after Cu has bound (42). A similar change may occur in  
 230 *BsCotA* to facilitate Cu(I) loading by *BsCsp3*.

231

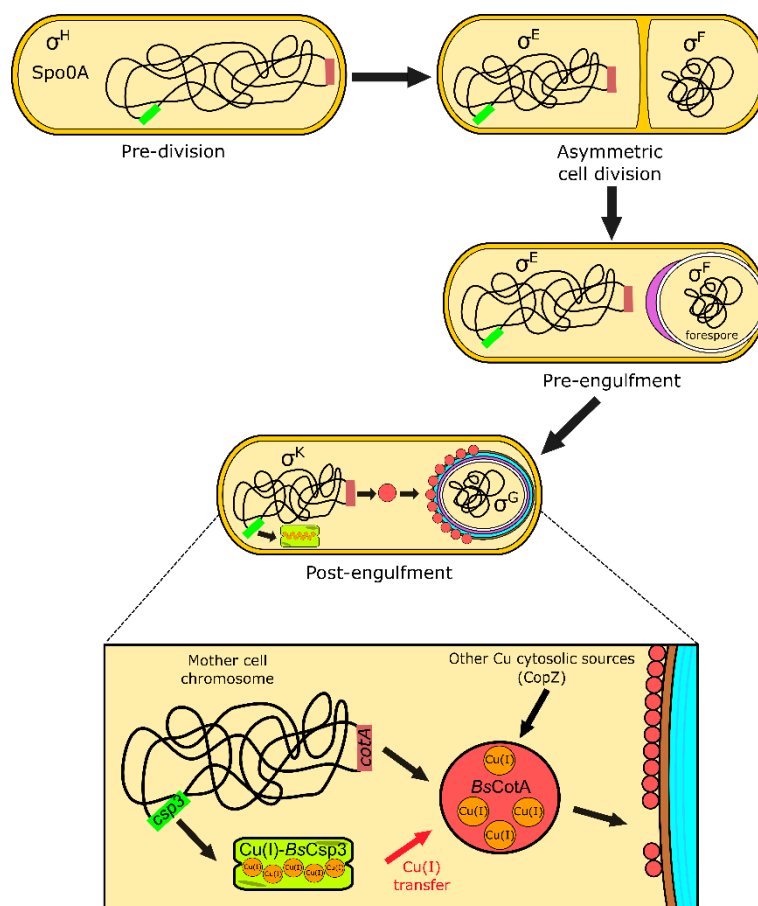

232

233 **Figure 5.** The proposed role of *BsCsp3* in Cu(I) acquisition by *BsCotA* during sporulation in *B. subtilis*.  
 234 The transcription factor Spo0A, along with  $\sigma^H$ , initiates sporulation. A septum asymmetrically divides the  
 235 cell into the forespore and mother cell, with  $\sigma^E$  and  $\sigma^F$ , respectively, activated within these. The mother cell  
 236 begins engulfment of the forespore and  $\sigma^E$  directs gene expression and initiation of spore coat (purple)  
 237 formation. The expression of *BsCsp3* and *BsCotA* now begins, promoted by  $\sigma^K$  (see Figure 1f) and coat

238 assembly continues. We propose that *BsCsp3* acquires Cu(I) during this stage of sporulation, which is  
239 transferred to *BsCotA* prior to insertion of the Cu-enzyme into the spore coat.

240

241 The expression of both *BsCsp3* and *BsCotA* are regulated by sigma factor K (SigK or  $\sigma^K$ ),  
242 which is produced after the forespore has been engulfed by the mother cell (Figure 5).

243 Upregulation of the *csp3* gene occurs prior to *cotA* (Figure 1f), thus allowing the storage protein  
244 to acquire Cu(I) before production of the enzyme requiring the metal. As *BsCotA* is one of the  
245 last proteins to be added to the spore coat (28), Cu(I) transfer from *BsCsp3* could occur during  
246 the very late stages of sporulation. Where *BsCsp3* acquires Cu(I) from is not known, but  
247 possible sources are Cu-enzymes that are not required by the spore, with the only currently  
248 known possibilities being COXs. The finding that *BsCsp3* provides Cu(I) to an enzyme requiring  
249 this metal ion suggests a similar role is performed by Csp3s in the cytosol of other bacteria. The  
250 novelty of this finding is further highlighted by there being only one currently known example of  
251 Cu acquisition by an enzyme from a partner protein in the cytosol. This is from the eukaryotic Cu  
252 metallochaperone CCS to the Cu,Zn-superoxide dismutase, which has been studied in  
253 considerable detail (1, 34, 35, 37-39, 43, 44).

254

255 Added importance to understanding correct metalation of *BsCotA* is provided by the  
256 observation that melanin formation interferes with the phagocytosis of pathogenic yeast, and is  
257 required to allow survival in macrophages (45). The related pigment produced by Cu-loaded  
258 *BsCotA* is important for spore survival (25, 28), and this may include within a host. *Bacillus*  
259 spores, and particularly those from *B. cereus*, cause food poisoning and are a common  
260 contaminant in a range of foods (46, 47). The development of more effective inactivation  
261 approaches requires a better understanding of enzymes that help protect spores such as *CotA*.  
262 This includes establishing how they acquire essential cofactors including Cu ions.

263

## 264 **Materials and Methods**

### 265 **Growth curves for WT and $\Delta csp3$ *B. subtilis* at increasing Cu** 266 **concentrations**

267 WT and  $\Delta csp3$  *B. subtilis* 168 strains were obtained from the Bacillus Genetic Stock Centre  
268 library. The disrupted *csp3* gene (*yhjQ*) was amplified by PCR using genomic DNA from the  
269  $\Delta csp3$  strain with primers that hybridise ~300 bp upstream and downstream of this region  
270 (Supplementary Table 3). The resulting fragment was sequenced with primers designed to  
271 hybridise ~ 20 bp from the ends of the PCR product (Supplementary Table 3) and matches that  
272 of the erythromycin resistance gene. To test the influence of Cu on WT and  $\Delta csp3$  strains,  
273 cultures were grown (agitation at 250 rpm) in LB media at 37 °C overnight, diluted (~100-fold) in  
274 LB and LB plus Cu(NO<sub>3</sub>)<sub>2</sub> (0.5 to 2.0 mM). The absorbance at 600 nm was measured at regular

275 intervals for up to 12 h, and also after 24 h growth. The Cu concentration in the stock solution  
276 used for these studies was regularly determined by atomic absorption spectrometry (AAS), as  
277 described previously (15).

278

## 279 **The construction of *B. subtilis* strains**

280 To re-insert the *csp3* gene plus its ribosome binding site (RBS) into the  $\Delta csp3$  strain, a region  
281 including an additional 28 bp at the 5' end was amplified from *B. subtilis* 168 genomic DNA by  
282 PCR using primers; rbs\_BsCsp3-F and rbs\_BsCsp3-R (Supplementary Table 3). The product  
283 was cloned into pGEM-T (Promega) and the resulting *rbs\_csp3* fragment sub-cloned into  
284 pDR111, which possesses the IPTG-inducible *P<sub>hyerspank</sub>* promoter (48), using HindIII and NheI to  
285 generate pDR111\_rbs\_csp3. To obtain a strain possessing an IPTG-inducible copy of the *csp3*  
286 gene (complemented  $\Delta csp3$ ),  $\Delta csp3$  *B. subtilis* was transformed with pDR111\_rbs\_csp3.  
287 Selection was achieved using spectinomycin (50  $\mu$ g/mL) and successful integration into the  
288 chromosomal *amyE* ( $\alpha$ -amylase) gene identified by growing on LB agar containing 1% starch  
289 and staining with iodine (49). A strain of  $\Delta csp3$  *B. subtilis* in which the region of pDR111 lacking  
290 the *csp3* gene was integrated into the genome (control  $\Delta csp3$ ) was also generated. The size of  
291 the fragment incorporated was confirmed by PCR using the primers pDR111\_int\_F and  
292 pDR111\_int\_R (Supplementary Table 3).

293

## 294 **The production of *B. subtilis* spores**

295 WT,  $\Delta csp3$ , complemented  $\Delta csp3$  and control  $\Delta csp3$  strains were grown overnight (agitation at  
296 250 rpm) in 20 mL Difco sporulation media (DSM). Cultures were diluted 50-fold into 200 mL  
297 DSM in a single 1 L Erlenmeyer flask and grown until the absorbance at 580 nm reached ~0.5.  
298 This was split into four 50 mL cultures, each in a 250 mL Erlenmeyer flask, and 50  $\mu$ M Cu(NO<sub>3</sub>)<sub>2</sub>  
299 and 1 mM IPTG added when required. The cultures were grown (agitation at 250 rpm) at 37 °C  
300 for 48 h and absorbance values at 580 nm measured at regular intervals. To purify spores (50)  
301 cultures were centrifuged (4 °C) for 10 min at 5,000 g, pellets re-suspended in 50 mM Tris pH  
302 7.2 plus 50  $\mu$ g/mL lysozyme and incubated at 37 °C for 1 h. After incubation and further  
303 centrifugation (4 °C) for 10 min at 5,000 g, pellets were washed once in sterile MilliQ water and  
304 centrifuged. The pellets were re-suspended in 0.05% SDS by vortexing, centrifuged (4 °C) for 10  
305 min at 5,000 g and subsequently washed three times with sterile MilliQ water. The purified spore  
306 stocks were verified by PCR (for example, Supplementary Figure 7) using primers listed in  
307 Supplementary Table 3 and stored at 4 °C.

308

## 309 **BsCotA activity of purified spores**

310 For kinetic measurements of BsCotA activity, purified spores from the WT,  $\Delta csp3$ ,  
311 complemented  $\Delta csp3$ , and control  $\Delta csp3$  strains were diluted with MilliQ water to give an

312 absorbance at 580 nm of  $\sim 1.2$  (measured accurately), and heated at 65 °C for 1 h prior to use.  
313 To determine the colony forming units per mL (CFUs/mL) for this suspension a  $5 \times 10^5$ -fold  
314 dilution in LB was plated (100  $\mu$ L) onto LB agar. The plates were incubated at 37 °C overnight  
315 and colonies counted. An aliquot of the heat-treated spore suspension (100  $\mu$ L) was added to  
316 900  $\mu$ L of 100 mM citrate-phosphate buffer pH 4.0 plus 0.1-2.4 mM ABTS, and the absorbance  
317 at 420 nm ( $\epsilon = 3.5 \times 10^4 \text{ M}^{-1}\text{cm}^{-1}$ ) measured for 5 min at 37 °C (Supplementary Figure 3). A  
318 control using 100  $\mu$ L of buffer was also measured and showed no change in absorbance at 420  
319 nm. The initial velocity ( $V_0$ ; typically reported in units of  $\mu\text{M}/\text{min}/\text{CFUs}/\text{mL}$ ) was calculated, and  
320 plots of  $V_0$  against ABTS concentration (Figure 2 and Supplementary Figure 5) were fit to the  
321 Michaelis-Menten equation to determine  $V_{\text{max}}$  (the maximum rate) and  $K_M$  (the Michaelis  
322 constant). Comparing  $V_{\text{max}}$  values calculated based on the absorbance at 580 nm of the heat-  
323 treated spore suspension, rather than using CFUs/mL, has no significant influence on the  
324 outcome of the study, but generally produces data with larger errors. The reactivity of heat-  
325 treated purified spores from WT and  $\Delta\text{csp3}$  *B. subtilis* with 2.4 mM ABTS was compared to that  
326 of the same spore suspension incubated with 250  $\mu\text{M}$   $\text{Cu}(\text{NO}_3)_2$  for 30 min at room temperature.  
327

## 328 Cloning and purification of *BsCotA*

329 The *cotA* gene was amplified from *B. subtilis* genomic DNA using primers CotA\_1F and  
330 CotA\_1R listed in Supplementary Table 3, and cloned into pGEM-T. After removing the NdeI site  
331 in the gene by QuickChange site-directed mutagenesis (with primers CotA\_2F and CotA\_2R,  
332 Supplementary Table 3), the product was excised with NdeI and BamHI and re-cloned into  
333 pET11a. *BsCotA* was overexpressed in BL21 *E. coli* (100  $\mu\text{M}$  IPTG) grown at 20 °C for 24 h. The  
334 protein was purified using a modified version of a published procedure (26). Cells from 0.5 to 1.0  
335 L of culture were resuspended in 20 mM Tris pH 8.5, sonicated and centrifuged at 40,000 g for  
336 30 min. The supernatant was diluted five-fold in 20 mM Tris pH 8.5 and loaded onto a HiTrap Q  
337 HP column (1 mL) equilibrated in the same buffer. Proteins were eluted with a linear NaCl  
338 gradient (0-500 mM, total volume 50 mL) and fractions analysed using 18% SDS-PAGE.  
339 *BsCotA*-containing fractions were diluted with 20 mM Tris pH 7.6 and loaded onto a HiTrap SP  
340 HP column (5 mL) and eluted with a linear NaCl gradient (0-500 mM, total volume, 200 mL). The  
341 *BsCotA*-containing fractions were heated at 70 °C for 30 min (*BsCotA* is a highly thermostable  
342 enzyme (26)), centrifuged at 40,000 g for 30 min, and the supernatant exchanged into 20 mM  
343 HEPES pH 7.5 plus 200 mM NaCl for further purification on a Superdex 75 10/300 GL gel-  
344 filtration column. Purified *BsCotA* had very little Cu or Zn(II) (the latter, a metal ion that  
345 commonly binds to Cu proteins when overexpressed in the cytosol of *E. coli*) associated with it  
346 when analysed by AAS (12, 13), and showed almost no ABTS oxidation activity. Samples ( $\sim 3$ -12  
347  $\mu\text{M}$ , quantified using an  $\epsilon$  value of  $84,739 \text{ M}^{-1}\text{cm}^{-1}$  at 280 nm (51)) were incubated with 250  $\mu\text{M}$   
348  $\text{Cu}(\text{NO}_3)_2$ , thoroughly exchanged and subsequently washed with a low concentration ( $\sim 10 \mu\text{M}$ ) of

349 ethylenediaminetetraacetic acid (EDTA). This gave rise to Cu-loaded *BsCotA* with a  $k_{\text{cat}}$  value of  
350 20-40  $\text{s}^{-1}$  for the oxidation of ABTS, compared to a literature value of 22  $\text{s}^{-1}$  for Cu-enzyme  
351 produced using a similar procedure (51).

352

### 353 **Purification of *BsCopZ* and sample preparation**

354 *BsCopZ* is purified with a small amount of Zn(II) bound, as described previously (13). Samples  
355 were therefore incubated with >10 equivalents of EDTA for 1 h and exchanged with 20 mM  
356 HEPES pH 7.5 plus 200 mM NaCl. The resulting protein had no Zn(II) associated with it and was  
357 reduced with dithiothreitol under anaerobic conditions and desalted as described previously (12,  
358 13).

359

### 360 **Analysing Cu(I) transfer from recombinant *BsCsp3* and *BsCopZ* to *BsCotA***

361 *BsCsp3* binding ~18 equivalents of Cu(I) was prepared by adding the appropriate amount of a  
362 buffered solution of Cu(I) in an anaerobic chamber (Belle Technology,  $\text{O}_2 \ll 2$  ppm) to apo-  
363 protein in 20 mM HEPES pH 7.5 plus 200 mM NaCl, quantified using the 5,5'-dithiobis(2-  
364 nitrobenzoic acid) (DTNB) assay (12, 13). Fully-reduced *BsCopZ* was also quantified using the  
365 DTNB assay and loaded with ~0.8 equivalents of Cu(I) under anaerobic conditions. Cu(I)-  
366 *BsCsp3* (~3  $\mu\text{M}$  binding ~53-54  $\mu\text{M}$  Cu(I)) was mixed with ~1.3  $\mu\text{M}$  of as-isolated *BsCotA*,  
367 requiring ~5.6  $\mu\text{M}$  Cu(I) to occupy all Cu sites. Cu(I)-*BsCopZ* (~50-53  $\mu\text{M}$  binding ~40-42  $\mu\text{M}$   
368 Cu(I)) was separately added to ~1  $\mu\text{M}$  of as-isolated *BsCotA*, requiring ~4  $\mu\text{M}$  Cu(I) to fill all Cu  
369 sites. Mixtures were incubated at room temperature in the anaerobic chamber for up to 48 h. A  
370 similar concentration of *BsCotA* was also incubated anaerobically with Cu(I), prepared as  
371 described above, a  $\text{Cu}(\text{NO}_3)_2$  solution (final concentrations of ~56-58  $\mu\text{M}$ ), buffer (20 mM  
372 HEPES pH 7.5 plus 200 mM NaCl ) alone, and also with  $\text{Cu}(\text{NO}_3)_2$  in air. To measure activity, 10  
373  $\mu\text{L}$  of each mixture was added to 990  $\mu\text{L}$  of aerated 100 mM citrate-phosphate buffer pH 4.0 plus  
374 2.4 mM ABTS, and the absorbance at 420 nm measured for up to 5 min at 37 °C (Figure 3). The  
375 removal of Cu(I) by BCS (~2.5 mM) was analysed for Cu(I)-*BsCsp3* (~0.8-1.2  $\mu\text{M}$  plus ~18  
376 equivalents of Cu(I)) samples used for the transfer experiments, both in the absence (folded  
377 *BsCsp3*) and presence (unfolding conditions) of guanidine-HCl (6.64 M) (12, 13). The  
378 absorbance increase at 483 nm due to formation of  $[\text{Cu}(\text{BCS})_2]^{3-}$  ( $\epsilon = 12,500 \text{ M}^{-1}\text{cm}^{-1}$ ) (31) was  
379 measured over time at 22 °C in 20 mM HEPES pH 7.5 plus 200 mM NaCl (Supplementary  
380 Figure 6).

381

### 382 **Acknowledgments**

383 We thank BBSRC for funding (grant BB/K008439/1 to C.D.). We are grateful to Newcastle  
384 University for an Overseas Research Scholarship (ORS) award to J.L.. We also thank Prof.

385 Heath Murray for help with generating *B. subtilis* mutant strains, Dr. Mark Harrison for cloning  
386 the *cotA* gene and Dr. Gianpiero Landolfi for purifying *BsCopZ*.

387

### 388 Author contributions

389 C.D. and J.L. conceived the project and designed the experiments. J.L. performed the  
390 experiments and analysed data with help from C.D. C.D. wrote the manuscript with help from  
391 J.L.

392

### 393 Competing interests

394 The authors declare no competing interests.

395

### 396 Additional information

397 Supplementary information is available for this paper.

398

### 399 References

- 400 1. Rae, T. D., Schmidt, P. J., Pufahl, R. A., Culotta, V. C. & O'Halloran, T. V. Undetectable  
401 intracellular free copper: The requirement for a copper chaperone for superoxide dismutase.  
402 *Science* **284**, 805–808 (1999) doi: 10.1126/science.284.5415.805.
- 403 2. Changela, A., Chen, K., Xue, Y., Holschen, J., O'Halloran, T. V. & Mondragón, A. Molecular  
404 basis of metal-ion selectivity and zeptomolar sensitivity by CueR. *Science* **301**, 1383–1387  
405 (2003) doi: 10.1126/science.1085950.
- 406 3. Festa, R. A. & Thiele, D. J. Copper: an essential metal in biology. *Curr. Biol.* **21**, R877–  
407 R883 (2011) doi: 10.1016/j.cub.2011.09.040.
- 408 4. Marckmann, D., Trasnea, P. I., Schimpf, J., Winterstein, C., Andrei, A., Schmoller, S.,  
409 Blaby-Haas, C. E., Friedrich, T., Daldal, F. & Koch, H. G. The *cbb<sub>3</sub>*-type cytochrome oxidase  
410 assembly factor CcoG is a widely distributed cupric reductase. *Proc. Natl. Acad. Sci. USA*  
411 **116**, 21166–21175 (2019) doi: 10.1073/pnas.1913803116.
- 412 5. Hassett, R. & Kosman, D. J. Evidence for Cu(II) reduction as a component of copper uptake  
413 by *Saccharomyces cerevisiae*. *J. Biol. Chem.* **270**, 128–134 (1995) doi:  
414 10.1074/jbc.270.1.128.
- 415 6. Rensing, C., Fan, B., Sharma, R., Mitra, B. & Rosen, B. P. CopA: An *Escherichia coli* Cu(I)-  
416 translocating P-type ATPase. *Proc. Natl. Acad. Sci. USA* **97**, 652–656 (2000) doi:  
417 10.1073/pnas.97.2.652.
- 418 7. Solioz, M., Abicht, H. K., Mermod, M. & Mancini, S. Response of Gram-positive bacteria to  
419 copper stress. *J. Biol. Inorg. Chem.* **15**, 3–14 (2010) doi: 10.1007/s00775-009-0588-3.
- 420 8. Rensing, C. & McDevitt S. F. The copper metallome in prokaryotic cells. *Met. Ions Life Sci.*  
421 **12**, 417–450 (2013) doi: 10.1007/978-94-007-5561-1\_12.

- 422 9. Meydan, S., Klepacki, D., Karthikeyan, S., Margus, T., Thomas, P., Jones, J. E., Khan, Y.,  
423 Briggs, J., Dinman, J. D., Vázquez-Laslop, N. & Mankin, A. S. Programmed ribosomal  
424 frameshifting generates a copper transporter and a copper chaperone from the same gene.  
425 *Mol. Cell.* **65**, 207–219 (2017) doi: 10.1016/j.molcel.2016.12.008.
- 426 10. Macomber, L. & Imlay, J. A. The iron-sulfur clusters of dehydratases are primary  
427 intracellular targets of copper toxicity. *Proc. Natl. Acad. Sci. USA* **106**, 8344–8349 (2009)  
428 doi: 10.1073/pnas.0812808106.
- 429 11. Ridge, P. G., Zhang, Y. & Gladyshev, V. N. Comparative genomic analyses of copper  
430 transporters and cuproproteomes reveal evolutionary dynamics of copper utilization and its  
431 link to oxygen. *PLoS One* **3**, e1378 (2008) doi: 10.1371/journal.pone.0001378.
- 432 12. Vita, N., Platsaki, S., Baslé, A., Allen, S. J., Paterson, N. G., Crombie, A. T., Murrell, J. C.,  
433 Waldron, K. J. & Dennison, C. A four-helix bundle stores copper for methane oxidation.  
434 *Nature* **525**, 140–143 (2015) doi: 10.1038/nature14854.
- 435 13. Vita, N., Landolfi, G., Baslé, A., Platsaki, S., Lee, J., Waldron, K. J. & Dennison, C. Bacterial  
436 cytosolic proteins with a high capacity for Cu(I) that protects against copper toxicity. *Sci.*  
437 *Rep.* **6**, 39065 (2016) doi: 10.1038/srep39065.
- 438 14. Dennison, C., David, S. & Lee, J. Bacterial copper storage proteins. *J. Biol. Chem.* **293**,  
439 4616–4627 (2018) doi: 10.1074/jbc.TM117.000180.
- 440 15. Lee, J. & Dennison, C. Cytosolic copper binding by a bacterial storage protein and interplay  
441 with copper efflux. *Int. J. Mol. Sci.* **20**, 4144 (2019) doi: 10.3390/ijms20174144.
- 442 16. Gu, W. & Semrau, J. D. Copper and cerium-regulated gene expression in *Methylosinus*  
443 *trichosporium* OB3b. *Appl. Microbiol. Biotechnol.* **101**, 8499–8516 (2017) doi:  
444 10.1007/s00253-017-8572-2.
- 445 17. DiSpirito, A. A., Semrau, J. D., Murrell, J. C., Gallagher, W. H., Dennison C. & Vuilleumier,  
446 S. Methanobactin and the link between copper and bacterial methane oxidation. *Microbiol.*  
447 *Mol. Biol. Rev.* **80**, 387–409 (2016) doi: 10.1128/MMBR.00058-15.
- 448 18. Radford, D. S., Kihlken, M. A., Borrelly, G. P. M., Harwood, C. R., Le Brun, N. E. & Cavet, J.  
449 S. CopZ from *Bacillus subtilis* interacts in vivo with a copper exporting CPx-type ATPase  
450 CopA. *FEMS Microbiol. Lett.* **220**, 105–12 (2003) doi: 10.1016/S0378-1097(03)00095-8.
- 451 19. Smaldone, G. T. & Helmann, J. D. CsoR regulates the copper efflux operon *copZA* in  
452 *Bacillus subtilis*. *Microbiology* **153**, 4123–4128 (2007) doi: 10.1099/mic.0.2007/011742-0.
- 453 20. Chillappagari, S., Miethke, M., Trip, H., Kuipers, O. P. & Marahiel, M. M. Copper acquisition  
454 is mediated by YcnJ and regulated by YcnK and CsoR in *Bacillus subtilis*. *J. Bacteriol.* **191**,  
455 2362–2370 (2009) doi: 10.1128/JB.01616-08.
- 456 21. Ma, Z., Cowart, D. M., Scott, R. A. & Giedroc, D. P. Molecular insights into the metal  
457 selectivity of the copper(I)-sensing repressor CsoR from *Bacillus subtilis*. *Biochemistry* **48**,  
458 3325–3334 (2009) doi: 10.1021/bi900115w.

- 459 22. Hirooka, K., Edahiro, T., Kimura, K. & Fujita, Y. Direct and indirect regulation of the *ycnKJl*  
460 operon involved in copper uptake through two transcriptional repressors, YcnK and CsoR, in  
461 *Bacillus subtilis*. *J. Bacteriol.* **194**, 5675–5687 (2012) doi: 10.1128/JB.00919-12.
- 462 23. Damle, M. S., Singh, A. N., Peters, S. C., Szalai, V. A. & Fisher, O. S. The YcnI protein from  
463 *Bacillus subtilis* contains a copper-binding domain. *J. Biol. Chem.* **297**, 101078 (2021) doi:  
464 10.1016/j.jbc.2021.101078.
- 465 24. Lauraeus, M., Haltia, T., Saraste, M. & Wikström, M. *Bacillus subtilis* expresses two kinds of  
466 haem-A-containing terminal oxidases. *Eur. J. Biochem.* **197**, 699–705 (1991) doi:  
467 10.1111/j.1432-1033.1991.tb15961.x.
- 468 25. Hullo, M. F., Moszer, I., Danchin, A. & Martin-Verstraete, I. CotA of *Bacillus subtilis* is a  
469 copper-dependent laccase. *J. Bacteriol.* **183**, 5426–5430 (2001) doi:  
470 10.1128/JB.183.18.5426-5430.2001.
- 471 26. Martins, L. O., Soares, C. M., Pereira, M. M., Teixeira, M., Costa, T., Jones, G. H.,  
472 Henriques, A. O. Molecular and biochemical characterisation of a highly stable bacterial  
473 laccase that occurs as a structural component of the *Bacillus subtilis* endospore coat. *J.*  
474 *Biol. Chem.* **277**, 18849–18859 (2002) doi: 10.1074/jbc.M200827200.
- 475 27. Enguita, F. J., Martins, L. O., Henriques, A. O. & Carrondo, M. A. Crystal structure of a  
476 bacterial endospore coat component. *J. Biol. Chem.* **278**, 19416–19425 (2003) doi:  
477 10.1074/jbc.M301251200.
- 478 28. McKenney, P. T., Driks, A. & Eichenberger, P. The *Bacillus subtilis* endospore: assembly  
479 and functions of the multilayered coat. *Nat. Rev. Microbiol.* **11**, 33–44 (2013) doi:  
480 10.1038/nrmicro2921.
- 481 29. Nicolas, P. et al. Condition-dependent transcriptome reveals high-level regulatory  
482 architecture in *Bacillus subtilis*. *Science* **335**, 1103–1106 (2012) doi:  
483 10.1126/science.1206848.
- 484 30. Vavrová, L., Muchová, K. & Barák, I. Comparison of different *Bacillus subtilis* expression  
485 systems. *Res. Microbiol.* **161**, 791–797 (2010) doi: 10.1016/j.resmic.2010.09.004.
- 486 31. Badarau, A. & Dennison, C. Copper trafficking mechanism of CXXC-containing domains:  
487 Insight from the pH dependence of their Cu(I) affinities. *J. Am. Chem. Soc.* **133**, 2983-2988  
488 (2011) doi: 10.1021/ja1091547.
- 489 32. Gunne, M., Al-Sultani, D. & Urlacher, V. Enhancement of copper content and specific  
490 activity of CotA laccase from *Bacillus licheniformis* by coexpression with CopZ copper  
491 chaperone in *E. coli*. *J. Biotechnol.* **168**, 252–255 (2013) doi: 10.1016/j.jbiotec.2013.06.011.
- 492 33. Pufahl, R. A., Singer, C. P., Peariso, K. L., Lin, S. J., Schmidt, P. J., Fahrni, C. J., Culotta,  
493 V. C., Penner-Hahn, J. E. & O'Halloran T. V. Metal ion chaperone function of the soluble  
494 Cu(I) receptor Atx1. *Science* **278**, 853–856 (1997) doi: 10.1126/science.278.5339.853.
- 495 34. Schmidt, P. J., Rae, T. D., Pufahl, R. A., Hamma, T., Strain, J., O'Halloran, T. V. & Culotta,  
496 V. C. Multiple protein domains contribute to the action of the copper chaperone for



- 497 superoxide dismutase. *J. Biol. Chem.* **274**, 23719–23725 (1999) doi:  
498 10.1074/jbc.274.34.23719.
- 499 35. Lamb, A. L., Torres, A. S., O'Halloran, T. V. & Rosenzweig, A. C. Heterodimeric structure of  
500 superoxide dismutase in complex with its metallochaperone. *Nat. Struct. Biol.* **8**, 751–755  
501 (2001) doi: 10.1038/nsb0901-751.
- 502 36. Banci, L., Bertini, I., Cantini, F., Felli, I. C., Gonnelli, L., Hadjiliadis, N., Pierattelli, R.,  
503 Rosato, A. & Voulgaris P. The Atx1-Ccc2 complex is a metal-mediated protein-protein  
504 interaction. *Nat. Chem. Biol.* **2**, 367–368 (2006) doi: 10.1038/nchembio797.
- 505 37. Banci, L., Bertini, I., Ciofi-Baffoni, S., Kozyreva, T., Zovo, K. & Palumaa, P. Affinity gradients  
506 drive copper to cellular destinations. *Nature* **465**, 645–648 (2010) doi:  
507 10.1038/nature09018.
- 508 38. Banci, L., Bertini, I., Cantini, F., Kozyreva, T., Massagni, C., Palumaa, P., Rubino, J. T. &  
509 Zovo, K. Human superoxide dismutase 1 (hSOD1) maturation through interaction with  
510 human copper chaperone for SOD1 (hCCS). *Proc. Natl. Acad. Sci. USA* **109**, 13555–13560  
511 (2011) doi: 10.1073/pnas.1207493109.
- 512 39. Sala, F. A., Wright, G. S. A., Antonyuk, S. V., Garratt, R. C. & Hasnain, S. S. Molecular  
513 recognition and maturation of SOD1 by its evolutionary destabilised cognate chaperone  
514 hCCS. *PLoS Biol.* **17**, e3000141 (2019) doi: 10.1371/journal.pbio.3000141.
- 515 40. Badarau, A. & Dennison, C. Thermodynamics of copper and zinc distribution in the  
516 cyanobacterium *Synechocystis* PCC 6803. *Proc. Natl. Acad. Sci. USA* **108**, 13007–13012  
517 (2011) doi: 10.1073/pnas.1101448108.
- 518 41. North, M. L. & Wilcox, D. E. Shift from entropic Cu<sup>2+</sup> binding to enthalpic Cu<sup>1+</sup> binding  
519 determines the reduction thermodynamics of blue copper proteins. *J. Am. Chem. Soc.* **141**,  
520 14329–14339 (2019) doi: 10.1021/jacs.9b06836.
- 521 42. Strolle, P., Hou, B. & Brüser, T. The Tat substrate CueO is transported in an incomplete  
522 folding state. *J. Biol. Chem.* **291**, 13520–13528 (2016) doi: 10.1074/jbc.M116.729103.
- 523 43. Culotta, V. C., Klomp, L. W., Strain, J., Casareno, R. L., Krems, B. & Gitlin, J. D. The copper  
524 chaperone for superoxide dismutase. *J. Biol. Chem.* **272**, 23469–23472 (1997) doi:  
525 10.1074/jbc.272.38.23469.
- 526 44. Wong, P. C., Waggoner, D., Subramaniam, J. R., Tessarollo, L., Bartnikas, T. B., Culotta, V.  
527 C., Price, D. L., Rothstein, J. & Gitlin J. D. Copper chaperone for superoxide dismutase is  
528 essential to active mammalian Cu/Zn superoxide dismutase. *Proc. Natl. Acad. Sci. USA* **97**,  
529 2886–2891 (2000) doi: 10.1073/pnas.040461197.
- 530 45. Eisenman, H. C. & Casadevall, A. Synthesis and assembly of fungal melanin. *Appl.*  
531 *Microbiol. Biotechnol.* **93**, 931–940 (2012) doi: 10.1007/s00253-011-3777-2.
- 532 46. Soni, A., Oey, I., Silcock, P. & Bremer, P. *Bacillus* spores in the food industry: a review on  
533 resistance and response to novel inactivation technologies. *Comp. Rev. Food Sci. Food*  
534 *Saf.* **15**, 1139–1148 (2016) doi: 10.1111/1541-4337.12231.

- 535 47. Jessberger, N., Dietrich, R., Granum, P. E. & Märtlbauer, E. The *Bacillus cereus* food  
536 infection as multifactorial process. *Toxins*, **12**, 701 (2020) doi: 10.3390/toxins12110701.
- 537 48. Quisel, J. D., Burkholder, W. F. & Grossman, A. D. *In vivo* effects of sporulation kinases on  
538 mutant Spo0A proteins in *Bacillus subtilis*. *J. Bacteriol.* **183**, 6573–6578 (2001) doi:  
539 10.1128/JB.183.22.6573-6578.2001.
- 540 49. Engman, J., Rogstam, A., Frees, D., Ingmer, H. & von Wachenfeldt, C. The YjbH adaptor  
541 protein enhances proteolysis of the transcriptional regulator Spx in *Staphylococcus aureus*.  
542 *J. Bacteriol.* **194**, 1186–1194 (2012) doi: 10.1128/JB.06414-11.
- 543 50. Tavares, M. B., Souza, R. D., Luiz, W. B., Cavalcante, R. C. M., Casaroli, C., Martins, E. G.,  
544 Ferreira, R. C. C. & Ferreira, L. C. S. *Bacillus subtilis* endospores at high purity and  
545 recovery yields: optimization of growth conditions and purification method. *Curr. Microbiol.*  
546 **66**, 279–285 (2013) doi: 10.1007/s00284-012-0269-2.
- 547 51. Durão, P., Chen, Z., Fernandes, A. T., Hilderbrandt, P., Murgida, D. H. Todorovic, S.,  
548 Pereira, M. M., Melo, E. P. & Martins, L. O. Copper incorporation into recombinant CotA  
549 laccase from *Bacillus subtilis*: characterisation of fully copper loaded enzymes. *J. Biol.*  
550 *Inorg. Chem.* **13**, 183–193 (2008) doi: 10.1007/s00775-007-0312-0.

551

## SUPPLEMENTARY INFORMATION

552

553 CONTENTS:

554 Supplementary Figure 1. The influence of Cu on the growth of WT and  $\Delta csp3$  *B. subtilis*.

555 Supplementary Figure 2. The influence of Cu levels in media on Cu accumulation by WT and  
556  $\Delta csp3$  *B. subtilis*.

557 Supplementary Figure 3 The influence of deleting the *csp3* gene and Cu levels on *BsCotA*  
558 activity in *B. subtilis* strains.

559 Supplementary Figure 4. Testing spores for enhanced *BsCotA* activity in the presence of Cu.

560 Supplementary Figure 5. The influence of Cu levels and IPTG on *BsCotA* activity in the control  
561  $\Delta csp3$  *B. subtilis* strain.

562 Supplementary Figure 6. The removal of Cu(I) from *BsCsp3* by the high-affinity ligand BCS.

563 Supplementary Figure 7. PCR analysis of purified spore stocks from the *B. subtilis* strains used  
564 in this study.

565 Supplementary Table 1. The influence of Cu concentration on the *BsCotA* activity of purified  
566 spores from WT and  $\Delta csp3$  *B. subtilis*.

567 Supplementary Table 2. The removal of Cu(I) from *BsCsp3* by BCS over time.

568 Supplementary Table 3. Primers used in this study.

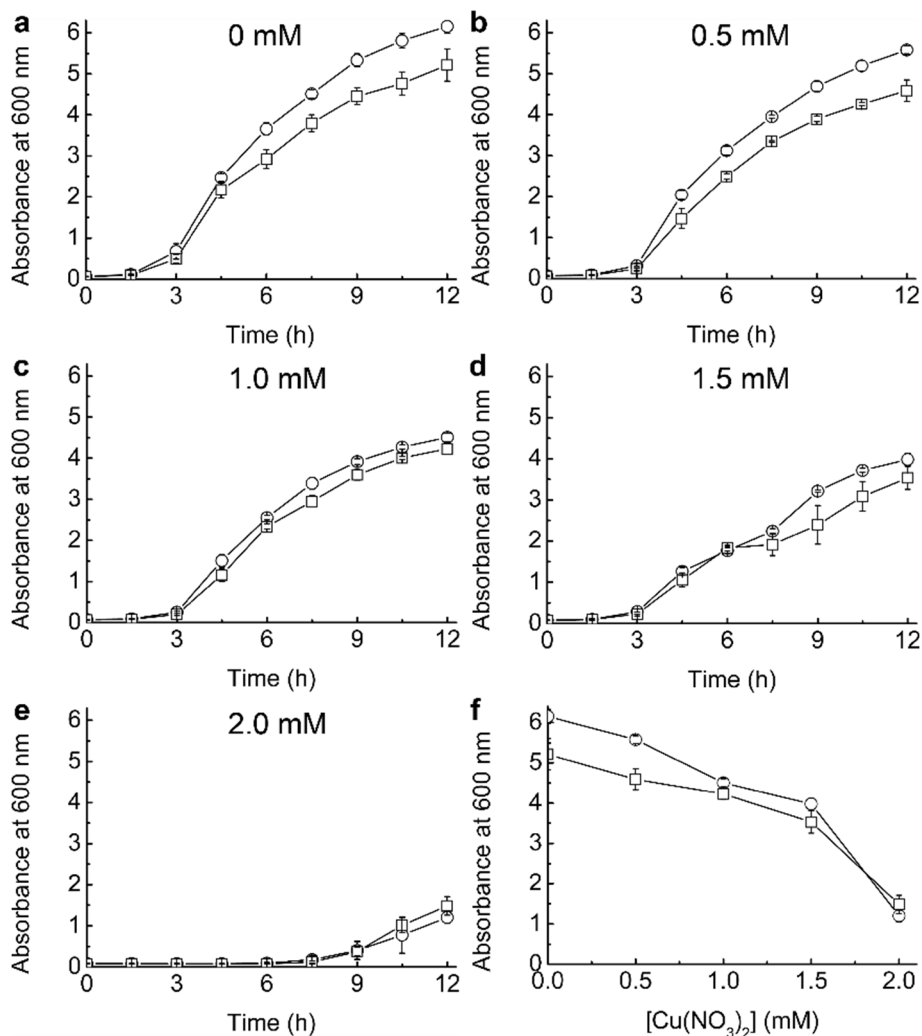

569

570 **Supplementary Figure 1.** The influence of Cu on the growth of WT and  $\Delta csp3$  *B. subtilis*.

571 Growth (37 °C) of WT (circles) and  $\Delta csp3$  (squares) *B. subtilis* in LB media plus 0 (a), 0.5 (b),

572 1.0 (c), 1.5 (d), and 2.0 (e) mM added  $\text{Cu}(\text{NO}_3)_2$ . The data obtained at 12 h is compared in (f),

573 and in all cases averages and standard deviations from three independent growth experiments

574 are shown. These results are similar to those we reported previously (13), albeit the influence on

575 growth starts to be observed at a Cu(II) concentration in the media that is ~0.5 mM lower in this

576 work (we have quantified Cu levels in the stock solutions used herein by AAS, but did not

577 previously (13)). The absorbance of these cultures were also measured at 24 h, and at up to 1.0

578 mM added  $\text{Cu}(\text{NO}_3)_2$  a significant decrease was observed compared to the value at 12 h for both

579 strains (consistent with previous data (13)). At higher added  $\text{Cu}(\text{NO}_3)_2$  concentrations, the

580 growth data showed no consistent pattern beyond 12 h. This differs to the enhanced cell death

581 that was seen previously for  $\Delta csp3$  *B. subtilis* after 12 h growth at reported media Cu

582 concentrations of 1.5-2.0 mM (13).

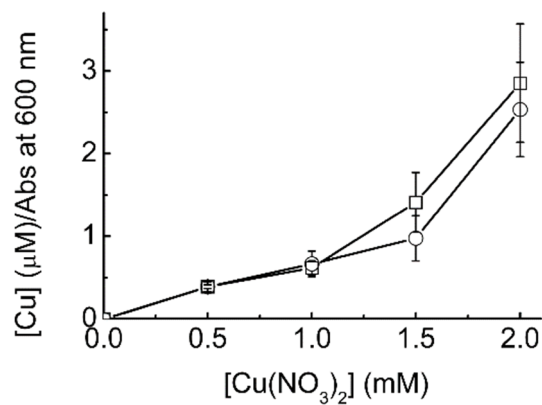

583

584 **Supplementary Figure 2.** The influence of Cu levels in media on Cu accumulation by WT and  
 585  $\Delta csp3$  *B. subtilis*. The intracellular Cu concentrations for WT (circles) and  $\Delta csp3$  (squares) *B.*  
 586 *subtilis* grown for 12 h in LB media plus increasing amounts of added Cu(NO<sub>3</sub>)<sub>2</sub>. The data shown  
 587 (average values and standard deviations) were measured for only two of the independent growth  
 588 experiments, but the trend is clear.

589

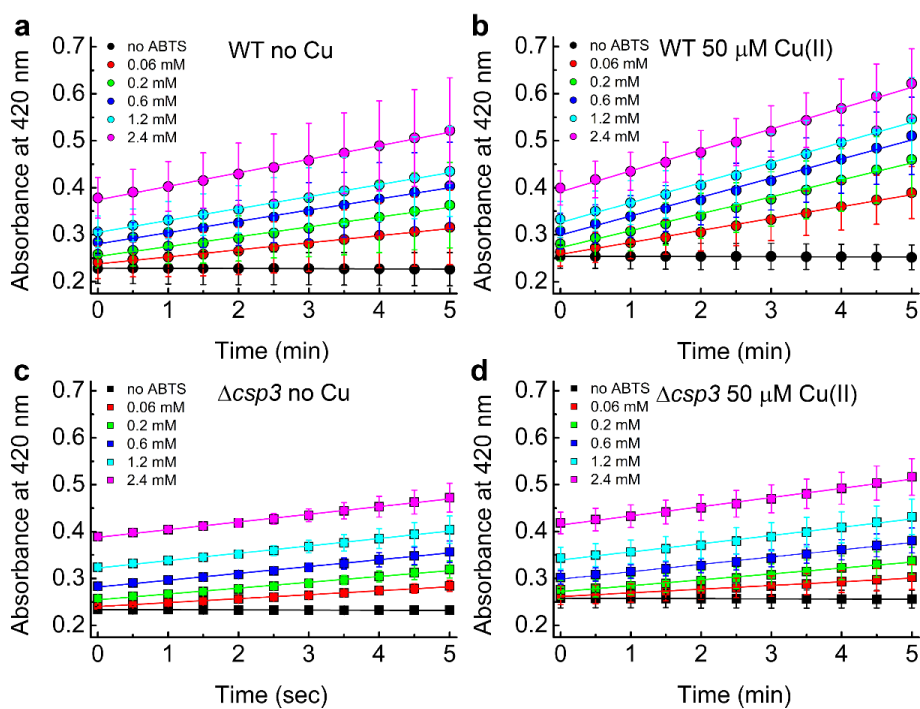

590

591 **Supplementary Figure 3.** The influence of Cu levels and deleting the *csp3* gene on *BsCotA*  
 592 activity in *B. subtilis* spores. Plots of absorbance at 420 nm against time at different  
 593 concentrations of ABTS (indicated) for spores from WT (a) and (b) and  $\Delta csp3$  (c) and (d) *B.*  
 594 *subtilis*. The data in (a) and (c) are from spores obtained in DSM without added Cu, whilst 50 μM  
 595 Cu(NO<sub>3</sub>)<sub>2</sub> was added for (b) and (d). The reactions with ABTS were measured in 100 mM citrate-  
 596 phosphate buffer pH 4.0 and the initial rates (averages from three different sets of spores with  
 597 error bars showing standard deviations) we used for Figure 2a (WT) and 2b ( $\Delta csp3$ ).

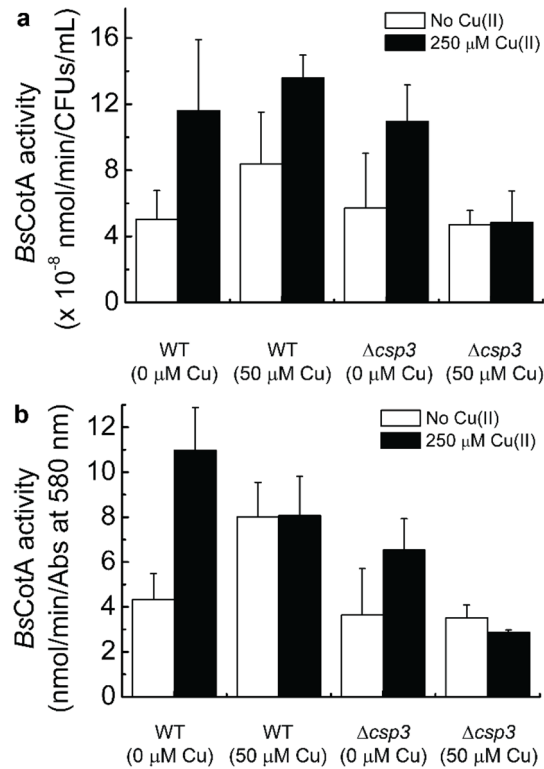

598

599 **Supplementary Figure 4.** Testing purified spores for enhanced *BsCotA* activity after incubation  
600 with Cu(II). The influence of incubating spores in 250  $\mu\text{M}$   $\text{Cu}(\text{NO}_3)_2$  from WT and  $\Delta\text{csp3}$  *B.*  
601 *subtilis* grown either in the absence or presence (50  $\mu\text{M}$ ) of  $\text{Cu}(\text{NO}_3)_2$  on their *BsCotA* activity.  
602 The activity units are reported based on both CFU values (a) and the absorbance (Abs) at 580  
603 nm (b) to quantify spores. Average values and standard deviations from three independent  
604 experiments on the same spores used for the data in Figure 2a,b are shown, and the values are  
605 listed in Supplementary Table 1. The reactions with ABTS were measured in 100 mM citrate-  
606 phosphate buffer pH 4.0.

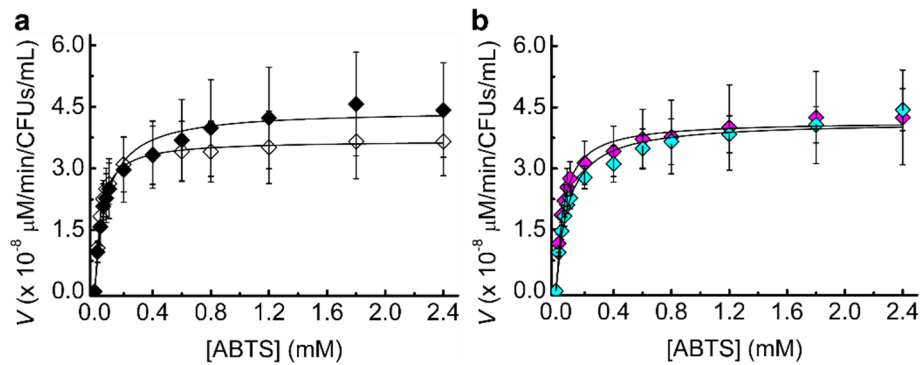

607

608 **Supplementary Figure 5.** The influence of Cu levels and IPTG on *BsCotA* activity in the control  
609  $\Delta csp3$  *B. subtilis* strain. Michaelis-Menten plots of *BsCotA* activity for heated purified spores  
610 from the control  $\Delta csp3$  strain. (a) The analysis of spores produced in media plus 0 (open  
611 symbols) and 50 (black filled symbols)  $\mu\text{M}$  added  $\text{Cu}(\text{NO}_3)_2$  with no added IPTG. (b) Data plus 1  
612 mM IPTG and 0 (magenta) and 50 (cyan)  $\mu\text{M}$   $\text{Cu}(\text{NO}_3)_2$ . Averages and standard deviations from  
613 kinetic measurements in 100 mM citrate-phosphate buffer pH 4.0 using three different sets of  
614 spores are shown.

615

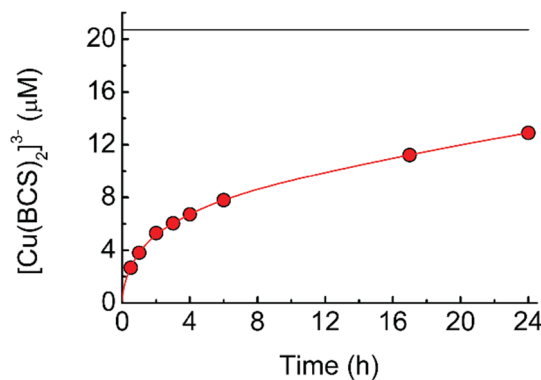

616

617 **Supplementary Figure 6.** The removal of Cu(I) from *BsCsp3* by the high-affinity ligand BCS. A  
618 plot of  $[\text{Cu}(\text{BCS})_2]^{3-}$  concentration against time for *BsCsp3* (1.08  $\mu\text{M}$ ) plus 18.0 equivalents of  
619 Cu(I) mixed with 2.5 mM BCS in 20 mM HEPES pH 7.5 plus 200 mM NaCl (red line). The data  
620 at 0.5, 1, 2, 3, 4, 6, 17 and 24 h, which correspond to times at which *BsCotA* activity was  
621 measured (Figure 4), are indicated by red circles. Average percentage removal compared to that  
622 for the unfolded samples, and the standard deviations, from three independent experiments are  
623 shown in Supplementary Table 2. The black line indicates the same experiment but with 6.64 M  
624 guanidine-HCl present in the buffer. This helps unfold the protein and removal is much faster  
625 giving the end point for the reaction (the value shown was obtained after incubation for 2 h).

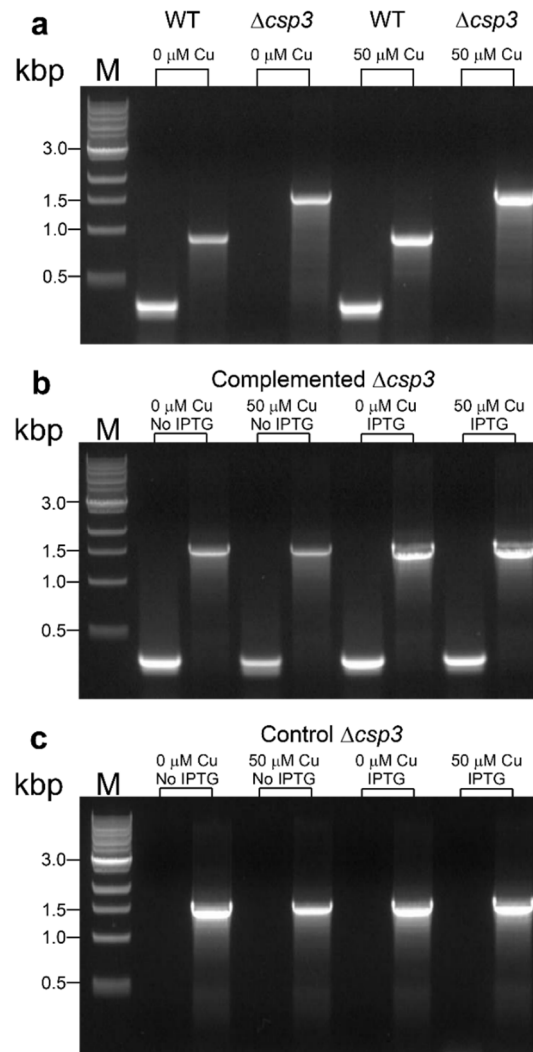

626

627 **Supplementary Figure 7.** PCR analyses of purified spore stocks from the *B. subtilis* strains  
628 used in this study. (a) The rbs\_BsCsp3-F and rbs\_BsCsp3-R primers (Supplementary Table 3)  
629 give a product of 373 bp for the WT strain, whilst BsCsp3+300-F and BsCsp3+300-R give  
630 fragments of 967 and 1663 bp for WT and  $\Delta csp3$ , respectively. (b) Re-introduction of the *csp3*  
631 gene is confirmed in the complemented strain using the rbs\_BsCsp3-F and rbs\_BsCsp3-F  
632 primers (as well as testing with BsCsp3+300-F and BsCsp3+300-R), and the same primers are  
633 used to analyse the control  $\Delta csp3$  strain (c). Analysis of spores used for the three independent  
634 experiments on all four strains shown in Figure 2 and Supplementary Figure 5 gave the same  
635 results.



636 **Supplementary Table 1.** The influence of Cu concentration on the *BsCotA* activity of purified  
 637 spores from WT and  $\Delta csp3$  *B. subtilis* <sup>a</sup>

| <i>B. subtilis</i> strain                                                    | Cu(II) in media <sup>b</sup> | Spores incubated with |                 |
|------------------------------------------------------------------------------|------------------------------|-----------------------|-----------------|
|                                                                              |                              | 250 $\mu$ M Cu(II)    | No Cu(II)       |
| <i>BsCotA</i> activity<br>nmol/min/CFUs/mL ( $\times 10^{-8}$ ) <sup>c</sup> |                              |                       |                 |
| WT                                                                           | -                            | 11.6 $\pm$ 4.29       | 5.02 $\pm$ 1.75 |
| WT                                                                           | +                            | 13.6 $\pm$ 1.37       | 8.38 $\pm$ 3.15 |
| $\Delta csp3$                                                                | -                            | 11.0 $\pm$ 2.20       | 5.71 $\pm$ 3.32 |
| $\Delta csp3$                                                                | +                            | 4.84 $\pm$ 1.92       | 4.71 $\pm$ 0.85 |
| <i>BsCotA</i> activity<br>nmol/min/Abs at 580 nm <sup>d</sup>                |                              |                       |                 |
| WT                                                                           | -                            | 11.0 $\pm$ 1.90       | 4.33 $\pm$ 1.15 |
| WT                                                                           | +                            | 8.07 $\pm$ 1.76       | 8.00 $\pm$ 1.55 |
| $\Delta csp3$                                                                | -                            | 6.53 $\pm$ 1.40       | 3.64 $\pm$ 2.07 |
| $\Delta csp3$                                                                | +                            | 2.87 $\pm$ 0.11       | 3.52 $\pm$ 0.57 |

638 <sup>a</sup> Average values and standard deviations from the three independently grown sets of spores,  
 639 used for the data in Figure 2a,b are shown (activity measurements measured in 100 mM citrate-  
 640 phosphate buffer pH 4.0). <sup>b</sup> The minus sign indicates that Cu was not added to media during  
 641 sporulation, whilst the plus sign indicates that the DSM was supplemented with 50  $\mu$ M Cu(NO<sub>3</sub>)<sub>2</sub>.  
 642 <sup>c</sup> Values used for Supplementary Figure 4a with the numbers of spores calculated using CFUs.  
 643 <sup>d</sup> Data shown in Supplementary Figure 4b and calculated by quantifying spores in suspensions  
 644 using the absorbance (Abs) at 580 nm, to enable direct comparison with a previous study (26).  
 645 The data for WT *B. subtilis* are very similar to those in the earlier work (26), even though in that  
 646 case 250  $\mu$ M Cu (50  $\mu$ M here) was added to the DSM during sporulation. The only discrepancy  
 647 is that previously (26), WT spores grown in the presence of Cu showed an approximate 2-fold  
 648 decrease in activity upon incubation with Cu(II). This observation is difficult to explain, but the  
 649 data reported in ref. 26 appears to be from a single replicate.  
 650

651 **Supplementary Table 2.** The removal of Cu(I) from *BsCsp3* by BCS over time <sup>a,b</sup>

| Time (h) | % Cu(I) removal <sup>c</sup> |
|----------|------------------------------|
| 0.5      | 12.9 $\pm$ 0.54              |
| 1        | 18.0 $\pm$ 0.71              |
| 2        | 24.7 $\pm$ 1.33              |
| 3        | 28.3 $\pm$ 1.23              |
| 4        | 31.5 $\pm$ 1.39              |
| 6        | 36.6 $\pm$ 1.50              |
| 17       | 52.9 $\pm$ 2.31              |
| 24       | 60.7 $\pm$ 2.35 <sup>d</sup> |

652 <sup>a</sup> Shown are the average percentage removal of Cu(I) from *BsCsp3* by BCS over time (and  
 653 standard deviations) from three independent experiments. <sup>b</sup> The amount of Cu(I) bound to the  
 654 protein was determined by mixing the Cu(I)-*BsCsp3* sample with 2.5 mM BCS in the presence of  
 655 6.64 M guanidine-HCl in 20 mM HEPES pH 7.5 plus 200 mM NaCl, which unfolds the protein  
 656 giving the maximum possible [Cu(BCS)<sub>2</sub>]<sup>3-</sup> concentration (the value used is after incubation for 2  
 657 h). <sup>c</sup> Percentage Cu(I) removal is determined using [Cu(BCS)<sub>2</sub>]<sup>3-</sup> concentration/maximum  
 658 [Cu(BCS)<sub>2</sub>]<sup>3-</sup> concentration  $\times$  100. <sup>d</sup> On one occasion the experiment was analysed up to 48 h  
 659 with 70% Cu(I) removal observed.

660 **Supplementary Table 3.** Primers used in this study

| Primers                   | Sequence                                            |
|---------------------------|-----------------------------------------------------|
| BsCsp3+300-F <sup>a</sup> | 5'-CATTCATGACAGTGCAGC-3'                            |
| BsCsp3+300-R <sup>a</sup> | 5'-CACAAGAGGACTGGACGC-3'                            |
| BsCsp3_seq-F <sup>b</sup> | 5'-CCGACAGCAGCAAATGCAGAAAACCA-3'                    |
| BsCsp3_seq-R <sup>b</sup> | 5'-AAACCGTCGACTTTTACTTGCG-3'                        |
| rbs_BsCsp3-F <sup>c</sup> | 5'-GGAGGACGCA <b>AGCTT</b> GCCGTGAAACATAAAACC-3'    |
| rbs_BsCsp3-R <sup>c</sup> | 5'-GGAGGACGCG <b>GCTAGCTT</b> ACGCTGCCATGCTGCGGC-3' |
| BsCsp3-F <sup>d</sup>     | 5'-GCGCATATGGAGCAATATTCTGAGGC-3'                    |
| BsCsp3-R <sup>d</sup>     | 5'-GCGCCATGGTTACGCTGCCATGCTGCGGC-3'                 |
| pDR111_int_F <sup>e</sup> | 5'-GTGAACGCTCTCCTGAGTAG-3'                          |
| pDR111_int_R <sup>e</sup> | 5'-GTCGGCTGAAAGATCGTAC-3'                           |
| CotA-1F <sup>f</sup>      | 5'-GGT <b>CATATG</b> ACACTTGAAAAATTTGTGGATGC-3'     |
| CotA-1R <sup>f</sup>      | 5'-GGT <b>GGATCC</b> TTATTTATGGGGATCAGTTATATCC-3'   |
| CotA-2F <sup>g</sup>      | 5'-CATTGACTTCACAG <b>CG</b> TATGAAGGAGAATCG-3'      |
| CotA-2R <sup>g</sup>      | 5'-CGATTCTCCTT <b>CATACG</b> CTGTGAAGTCAATG-3'      |

661 <sup>a</sup> Forward and reverse primers designed to hybridise ~300 bp upstream and downstream of the  
662 *csp3* gene giving PCR products of 1663 and 967 bp for  $\Delta csp3$  and WT *B. subtilis*. <sup>b</sup> Primers used  
663 to sequence the PCR product obtained from the  $\Delta csp3$  strain using primers BsCsp3+300-F and  
664 BsCsp3+300-R. <sup>c</sup> Forward (HindIII site in bold) and reverse (NheI site in bold, stop codon  
665 underlined) primers designed to amplify the *csp3* gene plus 28 bp at the 5' end to include its own  
666 RBS for cloning into pDR111. <sup>d</sup> Forward and reverse primers that amplify the *csp3* gene giving a  
667 PCR fragment of 345 bp for WT *B. subtilis*. <sup>e</sup> Primers that hybridise 294 bp upstream and 118 bp  
668 downstream of the region of pDR111 integrated into the *amyE* gene in the *B. subtilis* genome.  
669 For the complemented  $\Delta csp3$  strain these give a 831 bp fragment, whilst for the control  $\Delta csp3$   
670 strain the fragment size is 466 bp. <sup>f</sup> Forward (NdeI site in bold) and reverse (BamHI site in bold,  
671 stop codon underlined) primers designed to amplify the *cotA* gene. <sup>g</sup> Forward and reverse  
672 primers used to mutate the NdeI site (from CATATG to CATACG, highlighted in grey with the  
673 site mutation in bold) within the *cotA* gene.
